# Supplementary material
Source: PubMed Central journal article supplement (PMC3504348)

# Exercise Training and Habitual Physical Activity

## A Randomized Controlled Trial

Damon L. Swift, PhD, Neil M Johannsen, PhD, Catrine Tudor-Locke, PhD, Conrad P. Earnest, PhD, William D. Johnson, PhD, Steven N. Blair, PED, Martin Sénéchal, MSc, Timothy S. Church, MD, PhD

### Appendix A

#### Flow diagram

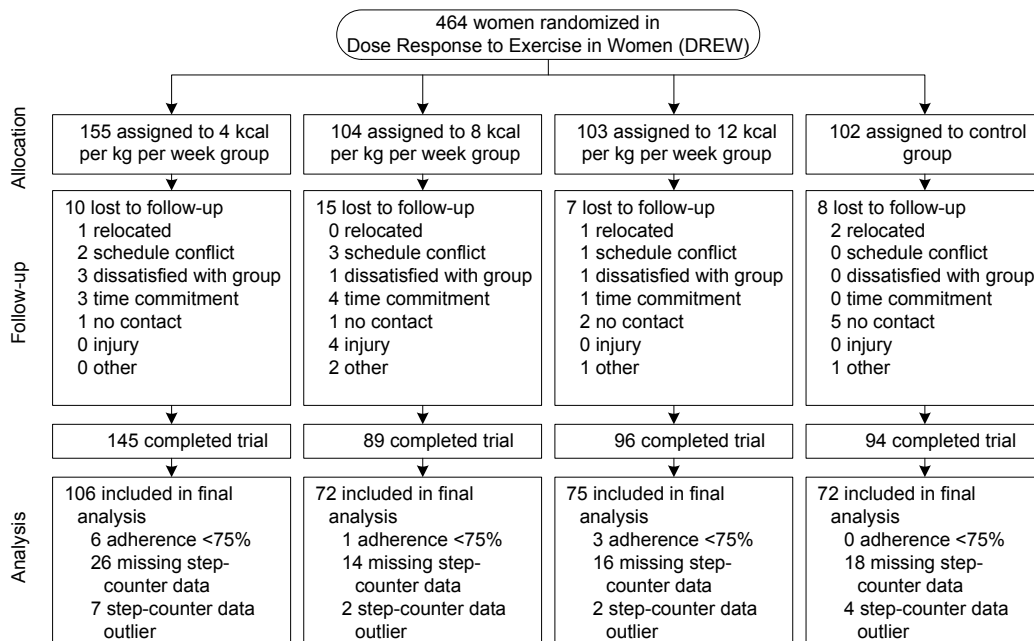

Supplement: NIHMS405910-supplement-01.pdf [file NIHMS405910-supplement-01.pdf]
